# Supplementary material for: Sociodemographic predictors are associated with compliance to a vaccination-reminder in 9692 girls age 14, Denmark 2014–2015
Source: PubMed Central journal article supplement — Prev Med Rep. 2018 Feb 23;10:93–9. doi: 10.1016/j.pmedr.2018.02.005 (PMC5984205; doi:10.1016/j.pmedr.2018.02.005), 2018-02-23
Supplement: mmc1.pdf [file mmc1.pdf]

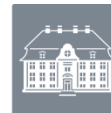

Alice Munro  
Vennemindevej 15, 4.tv  
2100 København Ø

Maj 2014

Kære forældre

Det danske børnevaccinationsprogram er et gratis tilbud til alle børn i Danmark. Vaccinationerne skal sikre, at børnene ikke bliver alvorligt syge af sygdomme, der kan forebygges.

Ifølge opslag i Det Danske Vaccinationsregister mangler Samuel (090512-xxxx) de vaccinationer, som er markeret med rødt:

| Anbefalet alder (Age) | Børnevaccinationer (Childhood vaccinations)        | Børneundersøgelser (Child health examinations) |
|-----------------------|----------------------------------------------------|------------------------------------------------|
| 3 mdr.                | Difteri – tetanus – kighoste – polio – Hib 1       |                                                |
| 5 mdr.                | Difteri – tetanus – kighoste – polio – Hib 2       | Børneundersøgelse                              |
| 12 mdr.               | Difteri – tetanus – kighoste – polio – Hib 3       | Børneundersøgelse                              |
| 15 mdr.               | Mæslinger – fåresyge – røde hunde (MFR 1)          |                                                |
| 2 og 3 år             |                                                    | Børneundersøgelse                              |
| 4 år                  | Mæslinger – fåresyge – røde hunde (MFR 2)          | Børneundersøgelse                              |
| 5 år                  | Difteri – tetanus – kighoste – polio revaccination | Børneundersøgelse                              |

**Vi vil derfor bede jer undersøge, om barnet har fået den/de markerede vaccinationer – enten ved at se om de er noteret i det gule vaccinationskort eller ved at kontakte jeres læge.**

**Bemærk**, at barnet kan have fået de anbefalede vaccinationer *uden*, at de er blevet registreret i Det Danske Vaccinationsregister, hvis fx lægen ikke har sendt en regning for vaccinationen til regionen, eller hvis vaccinationen er givet i udlandet eller på et hospital. Der er også en forsinkelse på registreringen på op til 3 måneder. I kan derfor se bort fra brevet, hvis barnet lige har fået vaccinationerne.

Du/I kan eventuelt selv oprette de vaccinationer, der mangler at blive registreret i sundhedsjournalen på [www.sundhed.dk](http://www.sundhed.dk) med NEMID.

Ønsker I ikke fremover at modtage påmindelser om manglende vaccinationer, kan dette fravælges via formularen på [www.ssi.dk/fravalg](http://www.ssi.dk/fravalg).

Med venlig hilsen  
Afdelingschef Kåre Mølbak  
Afdeling for Infektionsepidemiologi

VEND

### **Derfor henvender vi os...**

Folketinget og ministeren for sundhed og forebyggelse har fastsat ny lovgivning, som betyder, at Statens Serum Institut skal kontakte forældre til børn, der kan mangle vaccinationer, der tilbydes i børnevaccinationsprogrammet. Det fremgår samtidig af reglerne, at forældre, der ikke ønsker at blive kontaktet om manglende vaccinationer, skal have mulighed for at fravælge dette.

Baggrunden for de nye regler er, at man gerne vil øge vaccinationstilslutningen og sikre, at manglende vaccination ikke skyldes en forglemmelse.

### **Om det danske børnevaccinationsprogram**

- Sundhedsstyrelsen anbefaler, at børn får alle vaccinerne i børnevaccinationsprogrammet, men det er frivilligt at lade sig vaccinere.
- I Danmark tilbydes gratis vaccination mod 10 forskellige sygdomme, der kan være alvorlige for børn.
- En høj vaccinationsdækning kan føre til, at vi i fremtiden helt kan undgå nogle af de sygdomme, vi vaccinerer imod i dag.
- Når jeres barn bliver vaccineret, er I også med til at beskytte andre børn, der ikke må blive vaccineret, fx på grund af svækket immunforsvar.

**I kan læse mere om det danske børnevaccinationsprogram og påmindelsesordningen på [www.ssi.dk/vac](http://www.ssi.dk/vac)**

### ENGLISH TRANSLATION

Dear parent,

The Danish childhood vaccination programme is a free offer for all children in Denmark. The Danish Health and Medicines Authority recommends that all children receive the vaccinations that are part of the childhood vaccination programme. The vaccinations are given to ensure that children do not become seriously ill due to diseases that are preventable. Vaccination is voluntary.

In the Danish Vaccination Register, we can see that Samuel (090512-xxxx) has not received the childhood vaccinations marked in red in the table on the first page of this letter.

**Please contact your general practitioner to receive the lacking vaccinations and for any further advice.**

Registration of vaccinations can take up to three months. Please disregard this letter if your child has recently received the lacking vaccinations.

You can register any lacking vaccinations at [www.sundhed.dk](http://www.sundhed.dk) with your NEMID.

If you do not want to receive reminders of lacking vaccinations in the future, you can opt out via [www.ssi.dk/fravalg](http://www.ssi.dk/fravalg).

Yours sincerely,  
Head of Department Kåre Mølbak,  
Department of Infectious Disease Epidemiology
